# Supplementary material
Source: Springer Nature journal article supplement (https://www.springermedizin.de/resource/supplementary/13229_2014_145_MOESM5_ESM.pdf/9676268)

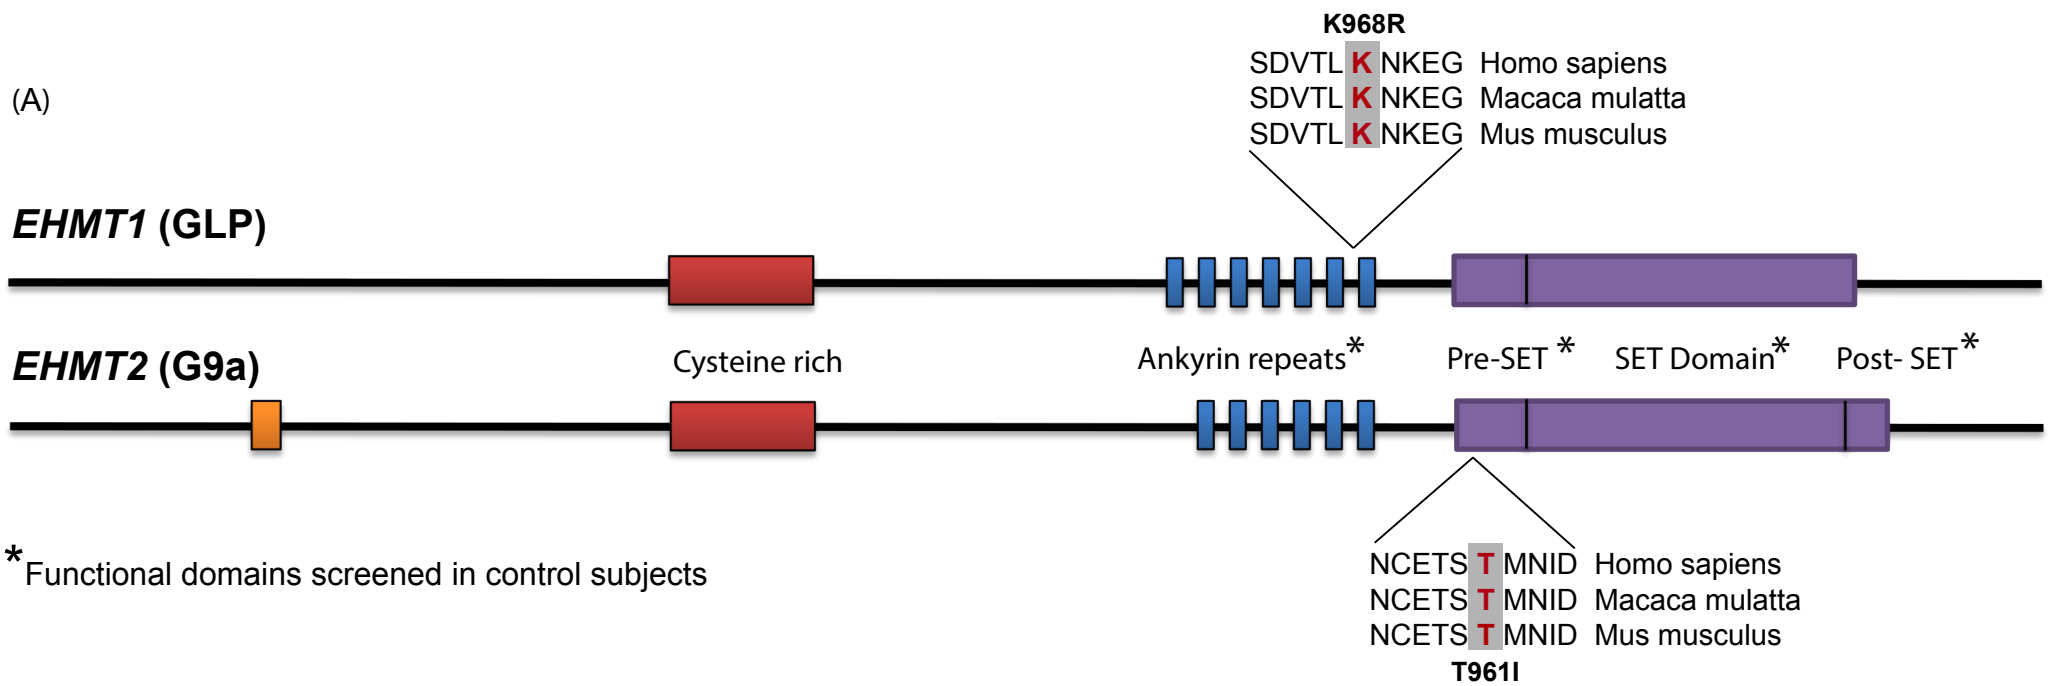

(B)

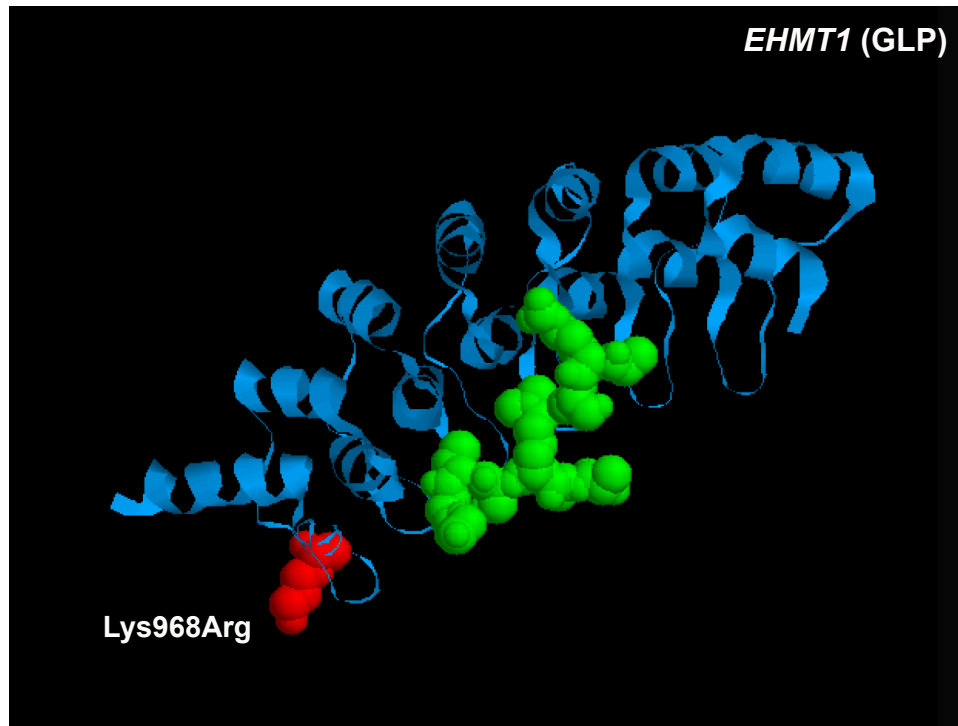

(C)

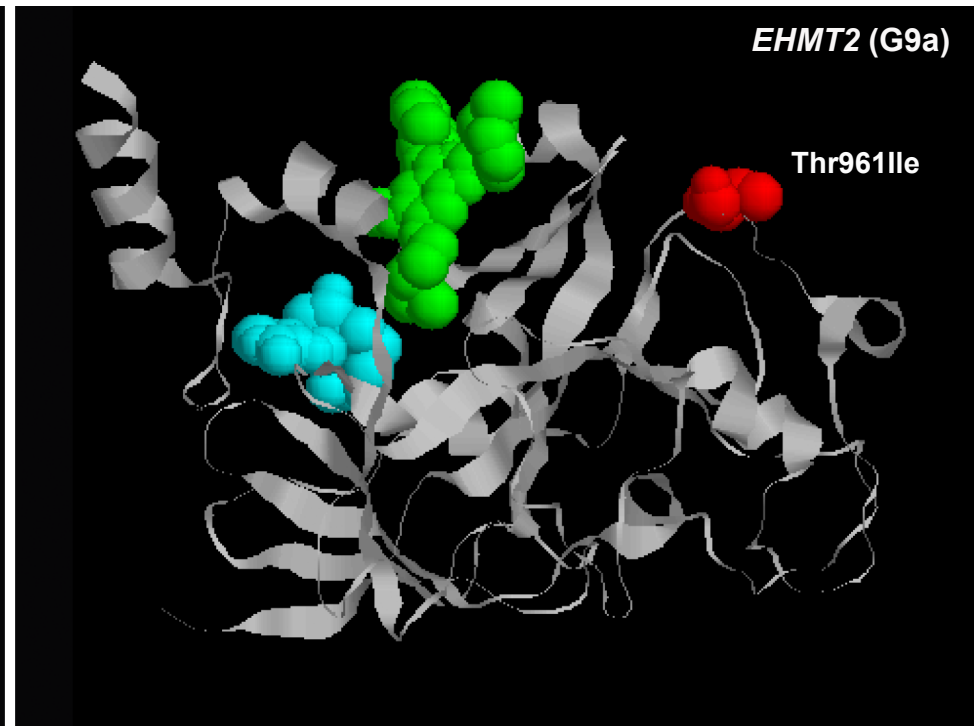

Supplement: MOESM5 [file 9676268]
